# Supplementary material for: Vulnerable Factors Affecting Urinary N-Methylformamide Concentration among Migrant Workers in Manufacturing Industries in Comparison with Native Workers in the Republic of Korea (2012–2019)
Source: MDPI journal article supplement (doi:10.3390/ijerph192013450), 2022-10-18
Supplement: s1 [file s1]

**Supplement Table S1. Subgroup analysis between the native and the migrant workers based on the level of urine concentration of N'-methylformamide**

| Characteristics                                    | Low and moderate ( $\leq 30$ mg/L) |                            |                | High ( $> 30$ mg/L)      |                           |                |
|----------------------------------------------------|------------------------------------|----------------------------|----------------|--------------------------|---------------------------|----------------|
| Nationality                                        | Native workers<br>(N=9,164)        | Migrant workers<br>(N=476) | P <sup>a</sup> | Native workers<br>(N=95) | Migrant workers<br>(N=28) | P <sup>a</sup> |
| <b>Sex, n(%)</b>                                   |                                    |                            | 0.372          |                          |                           | 0.099          |
| Male                                               | 7555 (82.4)                        | 387 (81.3)                 |                | 74 (77.9)                | 26 (92.9)                 |                |
| Female                                             | 1609 (17.6)                        | 89 (18.7)                  |                | 21 (22.1)                | 2 (7.1)                   |                |
| <b>Age group, n(%)</b>                             |                                    |                            | <0.001         |                          |                           | 0.017          |
| 20-29 years                                        | 2847 (31.1)                        | 201 (42.2)                 |                | 21 (22.1)                | 13 (46.4)                 |                |
| 30-39 years                                        | 2666 (29.1)                        | 190 (39.9)                 |                | 15 (15.8)                | 7 (25.0)                  |                |
| 40-49 years                                        | 2016 (22)                          | 61 (12.8)                  |                | 25 (26.3)                | 3 (10.7)                  |                |
| $\geq 50$ years                                    | 1635 (17.8)                        | 24 (5)                     |                | 34 (35.8)                | 5 (17.9)                  |                |
| <b>Number of workers, n(%)</b>                     |                                    |                            | <0.001         |                          |                           | 0.083          |
| <5                                                 | 106 (1.2)                          | 20 (4.2)                   |                | 6 (6.3)                  | 3 (10.7)                  |                |
| 5-50                                               | 1643 (17.9)                        | 260 (54.6)                 |                | 59 (62.1)                | 22 (78.6)                 |                |
| $\geq 50$                                          | 7415 (80.9)                        | 196 (41.2)                 |                | 30 (31.6)                | 3 (10.7)                  |                |
| <b>Types of industries, Manufactures of , n(%)</b> |                                    |                            | <0.001         |                          |                           | 0.018          |
| Rubber and plastics products                       | 1025 (11.2)                        | 117 (24.6)                 |                | 9 (9.5)                  | 8 (28.6)                  |                |
| Wearing apparel                                    | 223 (2.4)                          | 69 (14.5)                  |                | 7 (7.4)                  | 2 (7.1)                   |                |
| Textiles                                           | 393 (4.3)                          | 52 (10.9)                  |                | 13 (13.7)                | 6 (21.4)                  |                |
| Chemicals and chemical products                    | 3539 (38.6)                        | 58 (12.2)                  |                | 10 (10.5)                | -                         |                |
| Leather and related products                       | 201 (2.2)                          | 35 (7.4)                   |                | 35 (36.8)                | 11 (39.3)                 |                |
| Other manufacturing                                | 3783 (41.3)                        | 145 (30.5)                 |                | 21 (22.1)                | 1 (3.6)                   |                |
| <b>TWA of DMF, n(%)<sup>b</sup></b>                |                                    |                            | <0.001         |                          |                           | 0.284          |
| Low                                                | 5442 (59.4)                        | 132 (27.7)                 |                | 4 (4.2)                  | 2 (7.1)                   |                |
| Moderate                                           | 3194 (34.9)                        | 254 (53.4)                 |                | 39 (41.1)                | 7 (25)                    |                |
| High                                               | 528 (5.8)                          | 90 (18.9)                  |                | 52 (54.7)                | 19 (67.9)                 |                |
| <b>Years of employment, years(SD)</b>              | 7.83 (9.04)                        | 1.61(2.08)                 | <0.001         | 3.31 (6.05)              | 1.61(1.71)                | 0.577          |

a. P values were calculated using the statistics of Pearson's chi-square and Mann-whitney test

b. The employees having records of '0' or 'ND' were defined as 'Low' group. Others were classified into 'Moderate' and 'High' based on 5ppm, the adopted value as TLVs in ACGIH

DMF, Dimethyl Formamide; SD, Standard Deviation; TWA, Time-weighted average; ND, Not detected; TLVs, Threshold limit values; ACGIH, American Conference of Governmental Industrial Hygienists
